# Supplementary material
Source: PubMed Central journal article supplement (PMC2638227)

**Supplemental Table 1. Gene expression array analysis for *Gria4* in FeJ, HeJ and backcross mice.**

**Supplemental Table 1. Microarray results<sup>a</sup>**

| Probe set    |              |            | Fold change |            |           | F-test     |           |            | p-value   |            |           |            |           |            |
|--------------|--------------|------------|-------------|------------|-----------|------------|-----------|------------|-----------|------------|-----------|------------|-----------|------------|
| Gene         | Location     | ID         | N2-FeJ CX   | HeJ-FeJ CX | N2-FeJ HB | HeJ-FeJ HB | N2-FeJ CX | HeJ-FeJ CX | N2-FeJ HB | HeJ-FeJ HB | N2-FeJ CX | HeJ-FeJ CX | N2-FeJ HB | HeJ-FeJ HB |
| <i>Gria4</i> | intron 13    | 1460097_at | 1.9         | 1.9        | 1.9       | 2.0        | 0         | 0          | 0         | 0          | 0.0000    | 0.0000     | 0.0000    | 0.0000     |
| <i>Gria4</i> | 3' utr       | 1435722_at | -1.3        | -1.2       | -1.6      | -1.5       | 0.0001    | 0.0012     | 0.0000    | 0.0000     | 0.0351    | 0.0084     | 0.0012    | 0.0001     |
| <i>Gria4</i> | intron 2     | 1443285_at | -1.2        | 1.0        | -1.0      | -1.0       | 0.0417    | 0.7210     | 0.6993    | 0.6912     | 0.3188    | 0.4588     | 0.7507    | 0.3924     |
| <i>Gria4</i> | intron 8     | 1440891_at | 1.1         | -1.2       | 1.1       | -1.1       | 0.1041    | 0.0700     | 0.3964    | 0.2120     | 0.4225    | 0.1281     | 0.6638    | 0.1961     |
| <i>Gria4</i> | intron 6     | 1458230_at | 1.1         | -1.0       | 1.0       | 1.1        | 0.3744    | 0.9764     | 0.6065    | 0.2264     | 0.5810    | 0.5316     | 0.7270    | 0.2041     |
| <i>Gria4</i> | intron 8     | 1436772_at | 1.0         | -1.1       | 1.1       | 1.2        | 0.6692    | 0.0666     | 0.3552    | 0.0415     | 0.6769    | 0.1243     | 0.6511    | 0.0704     |
| <i>Gria4</i> | last 5 exons | 1421351_at | 1.0         | -1.1       | 1.1       | -1.0       | 0.9765    | 0.2127     | 0.1473    | 0.8923     | 0.7466    | 0.2423     | 0.5485    | 0.4518     |

| Probe set    |              |            | Mean fluorescence intensity (sample replicate-1, -2, -3) |          |          |         |         |         |          |          |          |
|--------------|--------------|------------|----------------------------------------------------------|----------|----------|---------|---------|---------|----------|----------|----------|
| Gene         | Location     | ID         | FeJ CX-1                                                 | FeJ CX-2 | FeJ CX-3 | N2 CX-1 | N2 CX-2 | N2 CX-3 | HeJ CX-1 | HeJ CX-2 | HeJ CX-3 |
| <i>Gria4</i> | intron 13    | 1460097_at | 8.00                                                     | 8.13     | 8.01     | 8.89    | 9.12    | 9.02    | 9.18     | 8.90     | 8.94     |
| <i>Gria4</i> | 3' utr       | 1435722_at | 9.84                                                     | 9.75     | 9.73     | 9.30    | 9.51    | 9.38    | 9.51     | 9.45     | 9.46     |
| <i>Gria4</i> | intron 2     | 1443285_at | 6.82                                                     | 6.66     | 6.76     | 6.34    | 6.64    | 6.54    | 6.87     | 6.93     | 6.57     |
| <i>Gria4</i> | intron 8     | 1440891_at | 8.19                                                     | 8.70     | 8.36     | 8.42    | 8.69    | 8.73    | 8.26     | 8.17     | 8.21     |
| <i>Gria4</i> | intron 6     | 1458230_at | 8.12                                                     | 7.93     | 8.06     | 8.13    | 8.07    | 8.16    | 8.14     | 7.97     | 8.02     |
| <i>Gria4</i> | intron 8     | 1436772_at | 8.50                                                     | 9.05     | 8.74     | 8.83    | 8.75    | 8.85    | 8.60     | 8.69     | 8.46     |
| <i>Gria4</i> | last 5 exons | 1421351_at | 7.50                                                     | 7.14     | 7.19     | 7.30    | 7.19    | 7.37    | 7.07     | 7.23     | 7.15     |

| Gene         | Location  | ID         | FeJ HB-1 | FeJ HB-2 | FeJ HB-3 | N2 HB-1 | N2 HB-2 | N2 HB-3 | HeJ HB-1 | HeJ HB-2 | HeJ HB-3 |
|--------------|-----------|------------|----------|----------|----------|---------|---------|---------|----------|----------|----------|
| <i>Gria4</i> | intron 13 | 1460097_at | 5.25     | 5.26     | 5.32     | 5.41    | 5.30    | 5.40    | 5.33     | 5.27     | 5.29     |
| <i>Gria4</i> | 3' utr    | 1435722_at | 10.19    | 9.91     | 10.31    | 9.46    | 9.42    | 9.50    | 9.53     | 9.70     | 9.54     |
| <i>Gria4</i> | intron 2  | 1443285_at | 7.06     | 6.78     | 6.76     | 6.78    | 6.74    | 6.96    | 6.55     | 7.04     | 6.87     |
| <i>Gria4</i> | intron 8  | 1440891_at | 8.88     | 8.50     | 8.89     | 8.76    | 8.88    | 8.92    | 8.53     | 8.63     | 8.68     |
| <i>Gria4</i> | intron 6  | 1458230_at | 7.98     | 7.85     | 8.03     | 7.94    | 8.00    | 8.05    | 7.84     | 8.28     | 8.06     |

|                           |            |      |      |      |      |      |      |      |      |      |
|---------------------------|------------|------|------|------|------|------|------|------|------|------|
| <i>Gria4</i> intron 8     | 1436772_at | 8.96 | 8.73 | 8.94 | 8.97 | 9.02 | 8.92 | 9.06 | 9.12 | 9.08 |
| <i>Gria4</i> last 5 exons | 1421351_at | 7.41 | 7.13 | 7.38 | 7.36 | 7.37 | 7.65 | 7.10 | 7.38 | 7.39 |

<sup>a</sup>N2, homozygous *Gria4*<sup>spwk1</sup> from the (HeJ x FeJ)F1 x HeJ backcross,

FeJ, C3HeB/FeJ

HeJ, C3H/HeJ

CX, cerebral cortex

HB, midbrain & hindbrain

**Supplemental Table 2. Effect of TTX on spontaneous EPSCs in nRT**

| <i>Gria4</i> <sup>spkw1/spkw1</sup><br>(n=4) | Frequency<br>(Hz) | Amplitude<br>(pA) | 10-90 % Rise<br>(ms) | Half width<br>(ms) | 90-10% Decay<br>(ms) |
|----------------------------------------------|-------------------|-------------------|----------------------|--------------------|----------------------|
| Control                                      | 30.5 ± 11.5       | 28.5 ± 3.5        | 0.24 ± 0.04          | 0.40 ± 0.04        | 0.76 ± 0.11          |
| TTX                                          | 30.4 ± 11.5       | 26.7 ± 3.8        | 0.25 ± 0.05          | 0.40 ± 0.05        | 0.75 ± 0.11          |
|                                              |                   |                   |                      |                    |                      |
| TTX<br>% of control                          | 97 ± 4 %<br>N.S.  | 93 ± 2 %<br>N.S.  | 103 ± 5 %<br>N.S.    | 99 ± 6 %<br>N.S.   | 99 ± 8 %<br>N.S.     |

**Supplemental Figure 1. Examples of EEG recordings from various genotypes displaying spike-wave discharges.** Shown in each are six differential traces from the four electrodes, over the right front (RF), left front (LF), right back (RB), left back (LB) surfaces of the cerebral cortex. Two sets of traces are shown for each genotype, illustrating the range of form in each.  
(also see uploaded high resolution file)

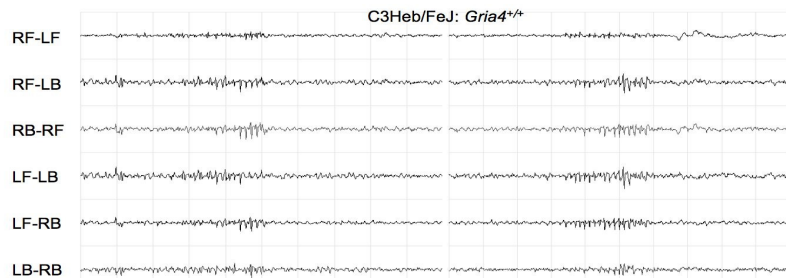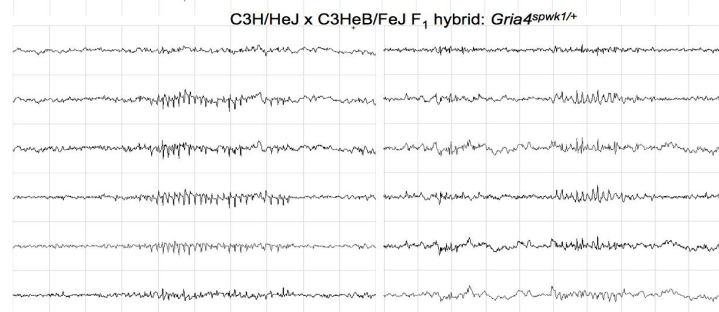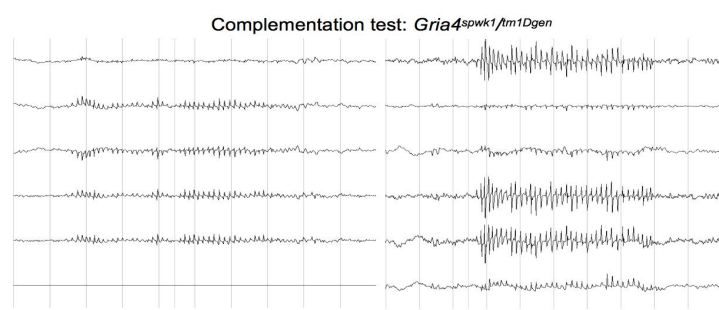

Double mutants: *Gria4*<sup>spkw1/spkw1</sup>, *Gria3*<sup>tm1Dgen/tm1Dgen</sup>

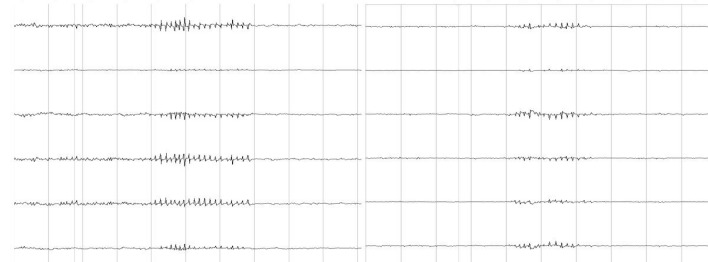

1 s  
2 mv

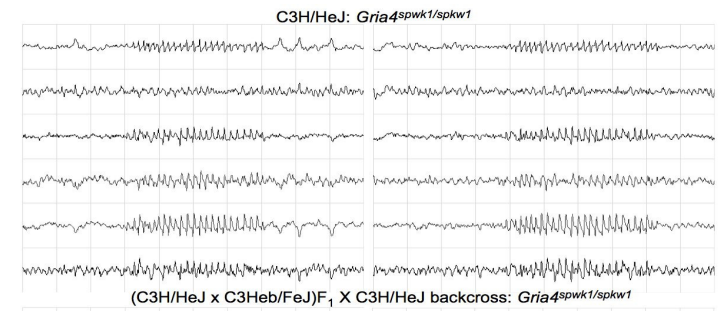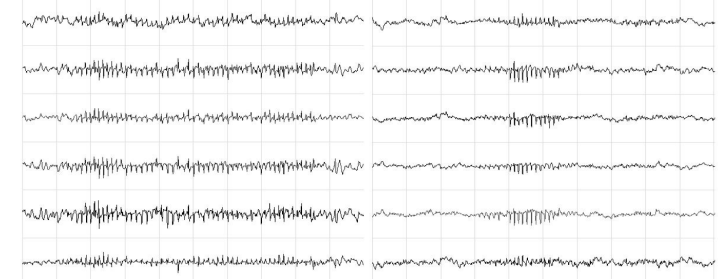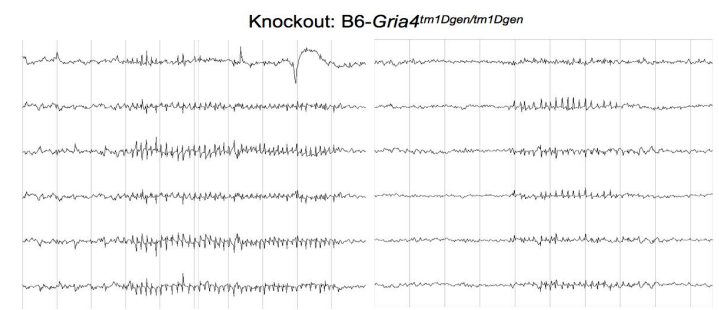

Supplemental  
Figure 1

**Supplemental Figure 2. Genomic sequence of IAP insertion in *Gria4* locus of HeJ mice, including junctions.**

| LOCUS      | EU529742.   |             | 5567 BP     |             |             |             |      |   |   |       |
|------------|-------------|-------------|-------------|-------------|-------------|-------------|------|---|---|-------|
| BASE COUNT | 1523        | A           | 1217        | C           | 1256        | G           | 1569 | T | 2 | OTHER |
| ORIGIN     | -           |             |             |             |             |             |      |   |   |       |
| 1          | TTTATTATAT  | GAATTTAAC   | TTATAAAAAG  | TCTCTCTCAC  | ACACATATTC  | ATATATATAT  |      |   |   |       |
| 61         | ATGAAGGATG  | TAAACAAAA   | TGAAAGTTTG  | TGTGGGAAGC  | CGCCCCACA   | TTTCGCCGTC  |      |   |   |       |
| 121        | CAAGATGGCG  | CTGACATCCT  | GTGTTCTAAG  | TTGGTAAACA  | AATAATCTGC  | GCATGAGCCA  |      |   |   |       |
| 181        | AGGGTATTTA  | CGACCACTTG  | TACTCTGTTT  | TTCCCGTGAA  | CGTCAGCTCG  | GCCATGGGCT  |      |   |   |       |
| 241        | GCAGCCAATC  | AGGGAGTGAT  | GCGCCCTAGG  | CAATGGTTGT  | TCTCTTTAAA  | ATAGAAGGGG  |      |   |   |       |
| 301        | TTTCGTTTTT  | CTCTCTCTCT  | TGCTTCTTGC  | TCTCTCTTGC  | TTCCCTCTCT  | TGCTTCTTGC  |      |   |   |       |
| 361        | TCTCTCTTGC  | TTCTTGCTCT  | CTCTTGCTTC  | CCTCTCTTGC  | TTCTTGCTCT  | CTCTTGCTTC  |      |   |   |       |
| 421        | TTGCTCTCTT  | TTCTTGAAGA  | TGTAAGAATA  | AAGCTTTGTC  | GCAGAAGATT  | CTGGTCTGTG  |      |   |   |       |
| 481        | GTGTTCTTCC  | TGGCCGGTCG  | TGAGAACGCG  | TCGAATAACA  | ATTGGTGCCG  | AATTCGGGGA  |      |   |   |       |
| 541        | CGAGAAAATC  | CGGGACGAGA  | AAAAACTCCG  | GACTGGCGCA  | GGAGGGATAC  | CTCATTCCAG  |      |   |   |       |
| 601        | AACCAGAACT  | GCGAATCAAG  | GTTATAAGGT  | TCCCGTAACA  | CAGACTGTTG  | AGAAGGATTC  |      |   |   |       |
| 661        | AACTGCCGAA  | TTCAGAACTC  | ATCAGCTGGG  | GAACGACGGT  | GATAAAGGTT  | CCCGTAAAGC  |      |   |   |       |
| 721        | GGAGAAGGAT  | GAAGGATFCA  | ACTGTATGAA  | TTTCAGAACTT | TTTCAGCTGGG | GAACGAGGTA  |      |   |   |       |
| 781        | AGTCTGATCT  | TGAACCTTCT  | AAGGAAATTC  | AAGACAGTCT  | ATCAGAAGTA  | AAGTGGAAAA  |      |   |   |       |
| 841        | TGGCTTTTAA  | AGTTATGTTT  | GGCCTTAAAT  | TTTTTCTAGT  | GTTTAGAAGCC | CTTTTGTTC   |      |   |   |       |
| 901        | TTTTTACATG  | TTATATAGTG  | CTTAAGATAG  | GGCTGAAAA   | TCTAGAGGAA  | ATTCAGGACA  |      |   |   |       |
| 961        | GTCTATCAGA  | AGTAAAGCGG  | GGAGAGAGAG  | TAGGAGCAAG  | GAGAAACGGT  | AAGTATACAG  |      |   |   |       |
| 1021       | GCCTTTCCAA  | GGGTC'TTGAA | CCCGAGGAAA  | AGTTAAGGTC  | AGGTAGGAAT  | ACCTGGGGAG  |      |   |   |       |
| 1081       | AGATTAGAAG  | GAAGAAAAAG  | AAAAAAGAAA  | AGAAAAAGA   | TCGATTAGCG  | GAGGTCTCTA  |      |   |   |       |
| 1141       | GGAGAAGGAG  | CCTGTGCTCT  | GAAGAAACAG  | ACTGGGAGAA  | AAAAGCGGCT  | CATTATGAAA  |      |   |   |       |
| 1201       | GAAAAGGATA  | CCAGCCGCCA  | AGTAAAGTGC  | TAACTAGTCA  | TTCAAGAAAA  | AAGCCAAAAG  |      |   |   |       |
| 1261       | CGCTGGCCGA  | AGGCCAGTTT  | GCTAATTGGC  | CTCAGGGCAA  | TCCGCTACCA  | GGTGCACTCC  |      |   |   |       |
| 1321       | CGCCCTATGC  | GGAGTCCCCG  | CCCTGCGTAG  | TGCGTCAGCC  | CGTAGTGCGT  | CAGCAATGCG  |      |   |   |       |
| 1381       | CAGAGAGGCA  | GTGCGCAGAG  | AGGCAGTGCG  | CAGACTCATT  | CATTCCCCGA  | GAGGAACAAA  |      |   |   |       |
| 1441       | GGAAAATAGA  | ACAGGCATTT  | CCAGTCTTTA  | AAGGAGCCGA  | GGGTGGGCGT  | GTCCACGCTC  |      |   |   |       |
| 1501       | CGTATAGAATA | CGTACAGATT  | AAGGAAATTTG | CCGAGTCGGT  | TCCGTAATAC  | GGAACCAATG  |      |   |   |       |
| 1561       | CTAATTTTAC  | CTTGGCCGAG  | TTAGACAGGC  | TGCGTGGCGT  | GGCACTGACT  | CCTGCCGACT  |      |   |   |       |
| 1621       | GGCAAAATGAT | TGCAAAAAGTC | GCTCTCCCTA  | GTATGGCCAA  | ATATGTGGAA  | TGGCGAGCTC  |      |   |   |       |
| 1681       | TGTGGCAGGA  | GGCGGCACAG  | GCGCAGGCC   | GAGCAAACGC  | TGCTGCTTTA  | ACTCCAGAGC  |      |   |   |       |
| 1741       | AGAGAGATTG  | GACTTTTGAC  | TTGTTAACGG  | GTCAGAGAGC  | TTATTTCTGCT | GAACCTGATA  |      |   |   |       |
| 1801       | AGAGGTATCA  | ATGGAAGATC  | TTACCACAGG  | GAATGTCCAA  | TAGTCCTATA  | ATGTGCCAGC  |      |   |   |       |
| 1861       | TTTATATACA  | AGAAGCTCTT  | TTGCCAGTGA  | GGGAACAAAT  | CCCCCTTTTA  | ATTTTGTCTC  |      |   |   |       |
| 1921       | TTTACATGGA  | TGACATCCTC  | CTGTGCCATA  | AAGACCTTAC  | CATGCTACAA  | AAGGCATATC  |      |   |   |       |
| 1981       | CTTTTCTACT  | TAAAAC'TTTA | AGTCAGTGGG  | GTCTACAGAT  | AGCCACAGAA  | AAGGTCCAAA  |      |   |   |       |
| 2041       | TTTCTGATAC  | AGGACAATTC  | TTGGGCTCTG  | TGGTGTCCCC  | AGATAAGATT  | GTCCCCCAAA  |      |   |   |       |
| 2101       | AGGTAGAGAT  | AAGAAGAGAT  | CACCTCCATA  | CCTTAAATGA  | TTTTCAAAA   | CTGTTGGGAG  |      |   |   |       |
| 2161       | ATATTTAATTG | GCTCAGACCC  | TTTTTAAAGA  | TTCTTCTTGC  | TGAGTTAAGG  | CCTTTGTTTA  |      |   |   |       |
| 2221       | GTATTTTAGA  | AGGAGATCCT  | CATATCTCCT  | CCCCTAGGAC  | TCTTACTCTA  | GCTGCTAACC  |      |   |   |       |
| 2281       | AGGCCTTACA  | AAAGGTAGAA  | AAGGCCTTAC  | AGAATGCACA  | ATTACAACGT  | ATTGAGGATT  |      |   |   |       |
| 2341       | CGCAGCCCTT  | CAGTTTGTGT  | TGCTTTAAGA  | CAGCACAAAT  | GCCAACGTGA  | GTTTTGTGGC  |      |   |   |       |
| 2401       | AGAATGGGCC  | ATTGTTGTGG  | ATCCATCCAA  | ACGTATCCCC  | AGCTAAAATA  | ATAGATTGGT  |      |   |   |       |
| 2461       | ATCCTGATGC  | AATTGCACAG  | CTTGCCCTTA  | AAGGCCATAA  | AGCAGCAATC  | ACCCACTTTG  |      |   |   |       |
| 2521       | GGCAAAGTCC  | ATATCTTTTA  | ATTGTACCTT  | ATACCGCTGC  | ACAGGTTCAA  | ACCTTGGCAG  |      |   |   |       |
| 2581       | CCGCATCTAA  | TGATTGGGCA  | GTTTTAGTTA  | CCTCCTTTTC  | AGGAAAAATA  | GATAACCATT  |      |   |   |       |
| 2641       | ATCCAAAGCA  | TCCAATCTTA  | CAGTTTGCCC  | AAAATCAATC  | TGTTGTGTTT  | CCACAAATAA  |      |   |   |       |
| 2701       | CAGTAAGAAA  | CCCCTTAAA   | AATGGGATTG  | TGGTATATAC  | TGATGGATCA  | AAAACCTGGCA |      |   |   |       |
| 2761       | TAGGTGCCTA  | TGTGGCTAAT  | GGTAAAGTGG  | TATCCAAACA  | GTATAATGAA  | AATTCACCTC  |      |   |   |       |
| 2821       | AAGTGGTAGA  | ATGTTTAGTG  | GTCTTAGAAG  | TTTTTAAAAC  | CTTTTAAAA   | CCCTTAATA   |      |   |   |       |
| 2881       | TTGTGTGAGA  | TTCTGTGTTT  | GTGGTAAATG  | CAGTAAATCT  | TTTAGAAGTG  | GCTGGAGTGA  |      |   |   |       |
| 2941       | TTAAGCCCTC  | CAGTAGAGTT  | GCCAATATTT  | TTTCAGCAGAT | ACAATTAGTT  | TTGTTATCTA  |      |   |   |       |
| 3001       | GAAGATCTCC  | TGTTTATATT  | ACTCATGTTA  | GAGCCCATTC  | AGGCCTACCT  | GGCCCCATGG  |      |   |   |       |
| 3061       | CTCTGGGAAA  | TGATTTGGCA  | GATAAGGCCA  | CTAAAGTGGT  | GGCTGCTGCC  | CTATCATCCC  |      |   |   |       |
| 3121       | CGTATAGAGC  | TGCAAGAAAT  | TTTCATAACA  | ATTTTTCATGT | GACGGCTGAA  | ACATTACGCA  |      |   |   |       |
| 3181       | GTGTTTTCTC  | CTTGACAAGA  | AAAGAAGCCC  | GTGACATTGT  | TACTCAATGT  | CAAAGCTGCT  |      |   |   |       |
| 3241       | GTGAGTTCTT  | GCCAGTTCCCT | CATGTGGGAA  | TTAACCCACG  | CGGTATTCTA  | CCTCTACAGG  |      |   |   |       |
| 3301       | TCGGCAAAAT  | GGATGTTACA  | CATGTTTCTT  | CCTTTGGAAA  | ACTTCAATAT  | CTCCATGTGT  |      |   |   |       |
| 3361       | CCATTGACAC  | ATGTTCTGGC  | ATCATGTTTG  | CTTCTCCGTT  | AAC'TGGAGAA | AAAGCCTCAC  |      |   |   |       |
| 3421       | ATGTGATTCA  | ACATTGTCTT  | GAGGCATGGA  | GTGCTTGGGG  | GAAACCCAGA  | CTCCTTAAGA  |      |   |   |       |
| 3481       | CTGATAATGG  | ACCAGCTTAT  | ACGTCCCAAA  | AATTTTCAGCA | GTTCTGCCGT  | CAGATGGACG  |      |   |   |       |
| 3541       | TAACCCACCT  | GACTGGACTT  | CCATACAACC  | CTCAAGGACA  | GGGTATTGTT  | GAGCGTGGCG  |      |   |   |       |
| 3601       | ATCGCACCTT  | CAAAGCCTAT  | CTTATAAAAAC | AGAAGAGGGG  | AAC'TTTTGAG | GAGACTGTAC  |      |   |   |       |
| 3661       | CCCGAGCACC  | AAGAGTGTCT  | GTGCTTTTGG  | CAC'TCTTTAC | ACTCAATTTT  | TTAAATATTG  |      |   |   |       |
| 3721       | ATGCTCATGG  | CCATACTGCG  | GCTGAACGTC  | ATTGTTTCAGA | GCCAGATAGG  | CCCAATGAGA  |      |   |   |       |

|      |            |             |            |            |            |            |
|------|------------|-------------|------------|------------|------------|------------|
| 3781 | TGGTTAAATG | GAAAAATGTC  | CTTGATAATA | AATGGTATGG | CCCGGATCCT | ATCTTGATAA |
| 3841 | GATCCAGGGG | AGCTATCTGT  | GTTTTCCAC  | AGAATGAAGA | CAACCCATTT | TGGGTACCAG |
| 3901 | AAAGACTCAC | CCGAAAAATC  | CAGACTGACC | AAGGGAATAC | TAATGTCCCT | CGTCTTGGTG |
| 3961 | ATGTCCAGGG | CGTCAATAAT  | AAAGAGAGAG | CAGCGTTGGG | GGATAATGTC | GACATTTCCA |
| 4021 | CTCCCAATGA | CGGTGATGTA  | TAATGCTCAA | GTATTCTCCT | GCTTTTTTAC | CACTAACTAG |
| 4081 | GAAGTGGGTT | TGGCCTTAAT  | TCAGACAGCC | TTGGCTCTGT | CTGGACAGGT | CCAGATGACT |
| 4141 | GACAACATTA | ACACTTTGTC  | AGCCTCAGTG | ACTACAGTCA | TAGATGAACA | GGCCTCAGCT |
| 4201 | AATGTCAAGA | TACAGAGAGG  | TCTCATGCTG | GTTAATCAAC | TCATAGATCT | TGTCCAGAAA |
| 4261 | CAACTGGATG | TATTATGACA  | AATAACTCAG | CAGGGATGTG | AACAAAAGTT | TCCGGGATTG |
| 4321 | TGTGTTATTT | CCATTCAGTA  | TGTTAAATTT | ACTAGGACAG | CTAATTTGTC | AAAAAGTCTT |
| 4381 | TTTCAGTATA | TGTTACAGAA  | TTGGATGGCT | GAA'TTGAAT | AGATCCTTCG | AGAATTGAGA |
| 4441 | CTTCAGGTCA | ACTCCACGCG  | CTTGGACCTG | TCGCTGACCA | AAAGATTACC | CAATTGGATC |
| 4501 | TCCTCAGCAT | TTTCTTTCTT  | TAAAAAATG  | GGTGGGATTA | ATATTATTTG | GAGATACACT |
| 4561 | TTGCTGTGGA | TTAGTGTGTC  | TTCTTTGATT | GGTCTGTAAG | CTTAAGGCC  | AACTAAGAG  |
| 4621 | AGACAAGGTG | GTATTGCCC   | AGGCGCTGTC | AGGACTAGAA | CATGGAGCTT | CCCCTGATAT |
| 4681 | ATCTATGCTT | AGGCAATAGG  | TCGCTGGCCA | CTCAGCTCTT | ATATCTCAG  | AGGCTAGACT |
| 4741 | CATTGCACGA | GATAGAGTGA  | GTGTGCTTCA | GCAGCCGAG  | AGAGTTGCAA | GGCTAAGCAC |
| 4801 | TGCAGTAGAA | GGGCTCTGCG  | GCACATATGA | GCCTATTCTA | GGGAGACATG | TCATCTTTCA |
| 4861 | TGAAGGTTCA | GTGTCCTAGT  | TCCCTTCCCC | CAGGCAAAAC | GACACGGGAG | CAGGTCAGGG |
| 4921 | TTGCTCTGGG | TAAAAGCCTG  | TAAGCCTAAG | AGCTAATCCT | GTACATGGCT | CCTTTACCTA |
| 4981 | CACACTGGGG | ATTTGACCTC  | TATCTCCACT | CTCAATAATA | TGGGTGGCCT | ATTTGCTCTT |
| 5041 | ATTAAGAA   | AAAGGGGGAA  | CTGTGGGAAG | CCGCCCCAC  | ATTCGCCGTC | ACAAGATGGC |
| 5101 | GCTGACATCC | TGTGTTCTAA  | GTTGGTAAAC | AAATAATCTG | CGCATGAGCC | AAGGGTATTT |
| 5161 | ACGACCACTT | GTA CTCTGTT | TTTCCCCTGA | ACGTCAGCTC | GGCCATGGGC | TGCAGCCAAT |
| 5221 | CAGGGAGTGA | TGCGCCCTAG  | GCAATGGTTG | TTCTCTTTAA | AATAGAAGGG | GTTTCGTTTT |
| 5281 | TCTCTCTCTC | TTGCTTCTTG  | CTCTCTCTTG | CTTCCCTCTC | TTGCTTCTTG | CTCTCTCTTG |
| 5341 | CTTCTTGCTC | TCTCTTGCTT  | CCCTCTCTTG | CTTCTTGCTC | TCTCTTGCTT | CTTCTTGCTT |
| 5401 | TTTCCTGAAG | ATGTAAGAAT  | AAAGCTTTGT | CGCANAAAT  | TCTGGTCTGT | GGTGTCTCTC |
| 5461 | CTGGCCGGTC | GTGAGAACGC  | GTCGAATAAC | AAGTTTGCAG | TGAGGTACTA | TACATTTTTT |
| 5521 | TCCATTTTGT | CCCCCTTTTA  | CATAAACCAT | GTCACCCACA | CTTATAC    |            |

//

**Supplemental Figure 3. Structure of the *Gria4*<sup>tm1Dgen</sup> allele.** a) Graphic depiction of the first four exons of the wild-type (wt) allele of *Gria4*, and below it a depiction of the targeting construct made by Deltagen, intended to replace exon 3 with a truncated exon 3-lacZ-neopgk cassette. At the bottom is a genomic map of the eventual targeted allele, showing that the left (L) arm of the construct inserted 3' to exon 3 and did not effect the replacement of exon 3, resulting in a mostly deleted lacZ-neopgk cassette and a partial duplication of intron 3 just downstream of exon 3, as determined by long-PCR (data not shown) and genomic DNA sequencing. Presumably at least some of the right (R) arm of the targeting construct underwent homologous recombination with endogenous intron 3.

b) Genomic sequence of deletion junction of lacZ-neo targeting cassette in the *Gria4* locus of *Gria4*<sup>tm1Dgen</sup>.

**A.**

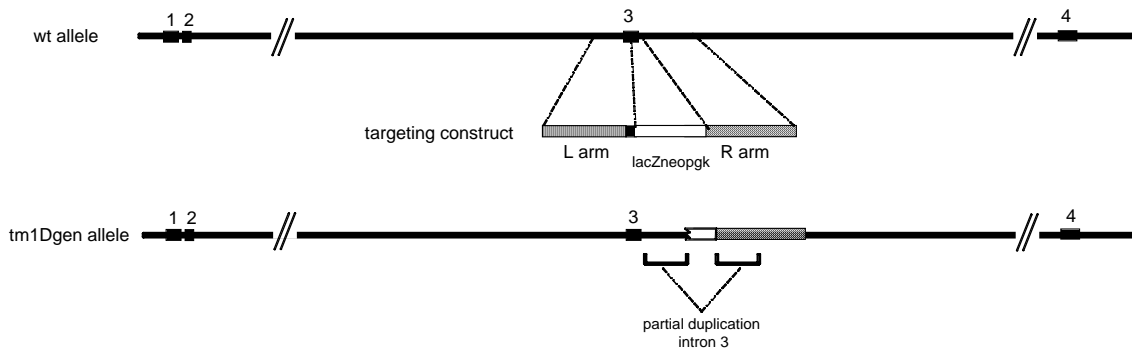

**B.**

```

LOCUS      EU529743.      278
BASE COUNT  92 A      47 C      51 G      88 T      0 OTHER
1  AAAAGGCTGT  TTAGCTCTCA  ACTACTAAAT  GTATAGAGTA  CACCAGCTTG  TAAAACCTGGA
   61  CATGATTAAC  TCAAATGGAG  TAATTTGGTG  GGTATAAGTA  TCATATTGCT  GGAGGAAGCA
  121  GTAATTTTAT  TGTTAGCCAT  AATTTATCTT  CAGCAGTATT  TAAATTAAAT  TTTTGCTTTC
  181  CATTC TAGTG  ATGATGAGGC  TACTGCTGAC  TCTCAACATT  CTACTCCTCC  AAAAAAGAAG
  241  AGAAAGGTAG  AAGACCCCAA  GGACTTTCCT  TCAGAATT

```



**Supplemental Figure 4. GluR3 protein levels are not affected by *Gria4* genotype.** Representative (of two trials each) western blot analysis of GluR3 expression in cerebellar preps from B6, *Gria4*<sup>tm1Dgen</sup>, and *Gria4*<sup>spwk1</sup> intra-C3H backcross adult mice. Below, the calbindin level is shown as the loading control for this blot. Overall GluR3 protein levels appear not to be affected by mutant genotypes at the *Gria4* locus.

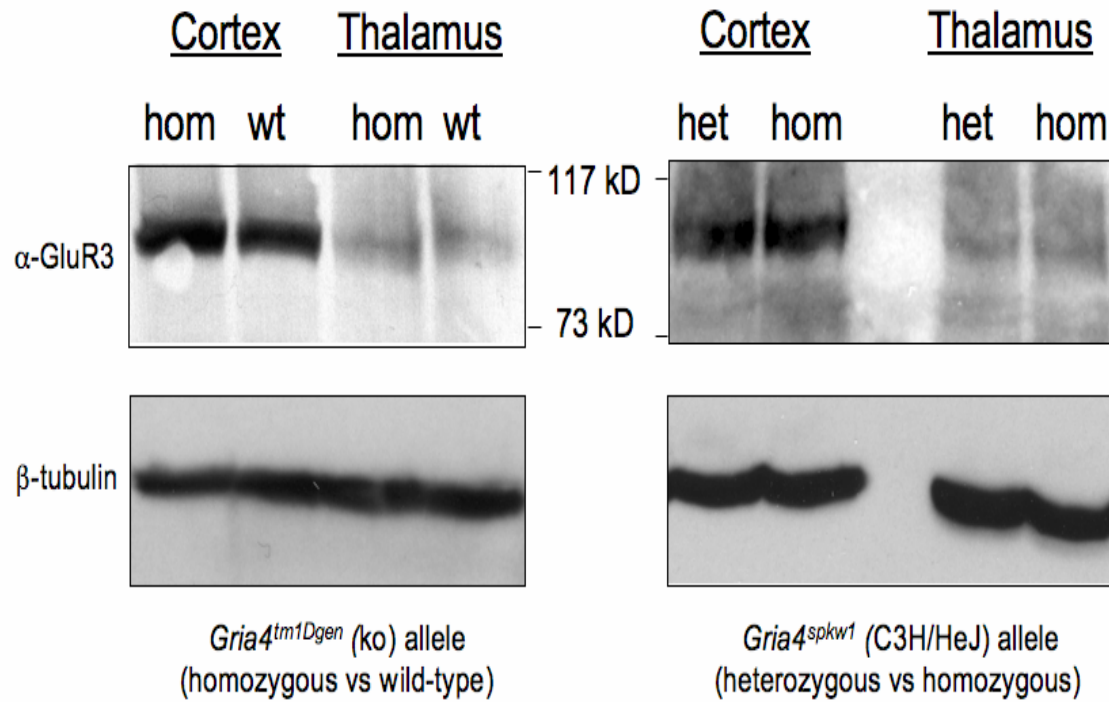

Supplement: ddn064_1.pdf [file ddn064_1.pdf]
